# Supplementary material for: Human Regulatory T Cells From Umbilical Cord Blood Display Increased Repertoire Diversity and Lineage Stability Relative to Adult Peripheral Blood
Source: Front Immunol. 2020 Apr 15;11:611. doi: 10.3389/fimmu.2020.00611 (PMC7174770; doi:10.3389/fimmu.2020.00611)
Supplement: Supplementary file 2 [file Table_1.XLSX]

## Sheet: Sheet1
Marker	Color	Catalog Number	Clone	Company
CD3	PerCPcy5.5	300430	UCHT1	Biolegend
CD3	BV510	563109	UCHT1	BD Biosciences
CD4	FITC	555346	RPA-T4	BD Biosciences
CD4	BV421	317434	OKT-4	Biolegend
CD4	BV510	300546	RPA-T4	Biolegend
CD4	BV650	317436	OKT-4	Biolegend
CD8	BV421	301036	RPA-T8	Biolegend
CD11a	APC	301212	HT111	Biolegend
CD15	PE	IM1954U	80H5	Beckman Coulter
CD25	FITC	302604	BC96	Biolegend
CD25	BV421	302630	BC96	Biolegend
CD25	BV605	302632	BC96	Biolegend
CD25	PE	555432	M-A251	BD Biosciences
CD27	PE	356406	MT271	Biolegend
CD28	BB515	564492	CD28.2	BD Biosciences
CD34	PE-Cy7	25-0349-41	4H11	eBioscience
CD38	PE	303506	HIT2	Biolegend
CD39	APC	328210	A1	Biolegend
CD45RA	PE-TR	MHCD45RA17	MEM-56	Invitrogen
CD45RO	BV421	304224	UCHL-1	Biolegend
CD49b	APC	17-0500-41	P1H5	eBioscience
CD54	APC	322712	HCD54	Biolegend
CD62L	BV510	304844	DREG56	Biolegend
CD73	BV421	344008	AD2	Biolegend
CD95	BV421	305623	DX2	Biolegend
CD95L	AF647	MCA2409A647	14C2	AbD Serotec
CD127	BV510	563086	HIL-7R	Biolegend
CD152	Pe-Cy7	349914	L3D10	Biolegend
CD183	BV510	353726	G025H7	Biolegend
CD194	PE-Cy7	359410	L291H4	Biolegend
CD197	BV650	353234	G043H&	Biolegend
CD221	PE	351806	1HF/CD221	Biolegend
CD223	PE	FAB2319P	FAB2319P	R&D
CD226	APC	338312	11A8	Biolegend
CD279	PE-Cy7	367414	NAT105	Biolegend
CX3CR1	FITC	341606	2A9-1	Biolegend
TIGIT	PE-Cy7	25-9500-41	MBSA43	eBioscience
HLA-DR	PE-Cy7	307616	L243	Biolegend
KLRG-1	BV510	138421	MAFA	Biolegend
FOXP3	BV421	320124	206D	Biolegend
FOXO1	FITC	NBP2-31376F	83N7F8	Novus Biologicals
GLUT-1	APC	FAB1418A	202915	R&D
Helios	PerCPcy5.5	137230	22F6	Biolegend
LCK	PE	558552	4/LCK-Y505	BD Biosciences
KI-67	PE	350504	KI-67	Biolegend
IL-2	BV605	500332	MQ1-17H12	Biolegend
IL-10	BV421	501421	JES3-9D7	Biolegend
IL-17A	AF647	512309	eBio64DEC17	eBioscience
IFN-γ	PE-Cy7	506518	B27	Biolegend
HLA-DR	APC-R700	565128	G46-6	eBioscience
CD73	BV480	746568	AD2	eBioscience
CCR6	BV650	563922	11A9	eBioscience
CD134 (ox40)	BV711	563664	Ber-ACT35	eBioscience
CD45RA	BB700	742249	5H9	eBioscience
Granzyme A	FITC	507204	CB9	eBioscience
CD56, CD20, CD19, CD14, CD8	BV510	302241, 344731, 367123	CD19 (HIB19) CD8 (SK1) CD14 (63D3)	Biolegend
IFNG	BV570	502533	4S.B3	Biolegend
TIGIT	BV605	372711	A15153G	Biolegend
CD127	BV750	747089	HIL-7R-M21	eBioscience
CD226	BV785	338321	11A8	Biolegend
Runx3	PE	564814	R3-5G4	Biolegend
GITR	PE-Cy5	311608	621	Biolegend
CD183	PE-Cy7	353719	G025H7	Biolegend
Granzyme K	APC	370509	GM26E7	Biolegend
CD25	SB436	62-0259-42	BC96	Thermo-Fisher
Helios	eFluor450	48-9883-42	22F6	Thermo-Fisher
Foxp3	PE-eFluor610	61-4776-42	PCH101	Thermo-Fisher
CD4	PE-Alexa 700	MHCD0424	s3.5	Thermo-Fisher
	Live Dead NIR			Thermo-Fisher
