# Supplementary material for: Human Regulatory T Cells From Umbilical Cord Blood Display Increased Repertoire Diversity and Lineage Stability Relative to Adult Peripheral Blood
Source: Front Immunol. 2020 Apr 15;11:611. doi: 10.3389/fimmu.2020.00611 (PMC7174770; doi:10.3389/fimmu.2020.00611)
Supplement: Supplementary file 3 [file Table_2.CSV]

feature	group	avgExprAPB_Treg_Pre	logFCAPB_Treg_Pre	statisticAPB_Treg_Pre	aucAPB_Treg_Pre	pvalAPB_Treg_Pre	padjAPB_Treg_Pre	pct_inAPB_Treg_Pre	pct_outAPB_Treg_Pre	avgExprCB_Treg_Pre	logFCCB_Treg_Pre	statisticCB_Treg_Pre	aucCB_Treg_Pre	pvalCB_Treg_Pre	padjCB_Treg_Pre	pct_inCB_Treg_Pre	pct_outCB_Treg_Pre	combined_p	.sample
JUNB	C01	1.759721341	-0.255111143	1753715.5	0.404873375	1.45E-25	1.94E-23	94.05815424	95.21548576	1.902513833	-0.748567198	1240766.5	0.212801958	1.40E-261	1.84E-257	96.74977738	99.46070878	2.81E-261	1
ZFP36	C01	1.009916773	-0.22781562	1762949.5	0.407005192	5.98E-25	7.47E-23	82.55372946	85.64645727	1.147852247	-0.645302991	1491581	0.255818768	2.97E-191	1.95E-187	86.06411398	95.18489985	5.93E-191	1
S100A10	C01	0.487704355	-0.181672224	1786314	0.412399262	6.33E-24	7.22E-22	54.23514539	64.82834186	0.587074968	-0.524192074	1576759	0.270427516	3.05E-175	1.33E-171	60.6856634	85.32357473	6.09E-175	1
S100A4	C01	0.41909641	-0.49436888	1351376.5	0.311986958	4.25E-102	1.12E-98	44.87989886	69.39371804	0.556648802	-0.613350465	1603006	0.274929098	4.77E-169	1.56E-165	51.20213713	81.1633282	9.54E-169	1
SRGN	C01	0.310617652	-0.530105346	1140538.5	0.263311621	1.54E-162	2.02E-158	35.71428571	72.57121987	0.207743089	-0.366195447	1843761.5	0.316220705	1.03E-134	1.35E-131	25.91273375	58.20493066	3.08E-162	1
SOX4	C01	0.029882849	0.011420922	2176421	0.502461725	0.297593787	0.564407947	2.591656131	2.118334551	0.735434036	0.46694887	4104953	0.704034188	4.35E-162	1.14E-158	64.3365984	26.54083205	8.70E-162	1
FOS	C01	0.112102377	-0.127964368	1953044.5	0.450891674	5.14E-15	2.88E-13	13.65360303	22.64426589	0.787479315	-0.719903839	1619600.5	0.277775196	3.96E-161	8.66E-158	60.81923419	84.86132512	7.92E-161	1
DUSP1	C01	0.459392408	-0.200130387	1802074	0.416037711	1.82E-22	1.87E-20	48.35651075	60.04382761	1.000815209	-0.57709122	1614797	0.276951355	1.38E-160	2.59E-157	78.67319679	93.6825886	2.77E-160	1
FTH1	C01	1.843531336	-0.529045406	1142508	0.263766312	1.45E-148	9.54E-145	98.54614412	99.56172389	2.008266265	-0.337571319	1677391.5	0.287686841	1.80E-144	2.96E-141	99.55476402	99.9614792	2.91E-148	1
NR4A2	C01	0.143407591	-0.18372926	1761945.5	0.406773402	3.03E-37	6.85E-35	18.8369153	35.79254931	0.211598251	-0.388310244	1824695.5	0.312950724	2.93E-139	4.27E-136	25.11130899	58.35901387	5.86E-139	1
CRIP1-ENSG00000213145	C01	0.217853778	-0.194907501	1768137	0.408202809	1.02E-31	1.75E-29	27.30720607	42.76844412	0.645867866	-0.480063359	1802765.5	0.309189544	3.34E-121	3.99E-118	60.86375779	82.04930663	6.69E-121	1
UBC	C01	1.166700438	-0.413419876	1268567	0.292869056	3.63E-116	1.59E-112	91.15044248	97.00511322	1.140216281	-0.279909105	2066557.5	0.354432105	4.35E-70	2.03E-67	89.71504898	95.14637904	7.26E-116	1
B2M	C01	3.0899848	-0.257052422	1272069.5	0.293677664	1.64E-113	5.38E-110	100	100	3.331608021	-0.15290994	2052627.5	0.352042992	7.70E-71	3.74E-68	100	100	3.28E-113	1
DUSP2	C01	0.273277158	-0.220412116	1734118	0.400348977	1.17E-34	2.28E-32	31.22629583	48.31994156	0.375856754	-0.416743466	1881696	0.322726793	1.42E-112	1.55E-109	40.82813891	67.79661017	2.84E-112	1
PPP1R15A	C01	0.157429694	-0.147802741	1822950	0.42085727	1.28E-27	1.93E-25	19.5954488	34.58728999	0.638857208	-0.417935082	1857883.5	0.318642747	5.55E-110	5.60E-107	60.55209261	82.97380586	1.11E-109	1
AHNAK	C01	0.096988478	-0.176803855	1756998	0.405631192	1.09E-43	3.57E-41	12.57901391	30.71585099	0.114454966	-0.261399265	2090413.5	0.358523611	1.67E-100	1.56E-97	14.82635797	41.87211094	3.33E-100	1
AIF1	C01	0.097947075	0.086215761	2405158	0.555269333	6.82E-52	2.72E-49	12.64222503	1.607012418	0.39109413	0.248918368	3733446	0.640317593	1.01E-96	8.79E-94	44.87978629	17.91217257	2.01E-96	1
EEF1B2	C01	1.953582354	0.331560463	2985276.5	0.689199001	1.10E-96	2.40E-93	99.62073325	97.84514244	2.123142717	0.229620605	3782685.5	0.648762584	3.46E-72	1.89E-69	99.9554764	99.30662558	2.20E-96	1
SH3BGRL3	C01	0.731389294	-0.356764319	1453738.5	0.335618869	1.98E-75	2.59E-72	71.68141593	84.623813	0.917922019	-0.351144487	1946388	0.333822018	2.44E-91	2.00E-88	81.96794301	89.98459168	4.87E-91	1
CD99	C01	0.283237701	-0.240347235	1610157.5	0.371730706	1.97E-53	9.22E-51	35.20859671	56.79327977	0.322611375	-0.304696782	2003778	0.343664889	4.74E-91	3.65E-88	39.84861977	64.13713405	9.47E-91	1
HLA-B	C01	2.315016687	-0.276830941	1374034	0.317217805	9.85E-90	1.85E-86	99.93678887	99.96347699	1.938986278	-0.13375734	2397695	0.411224989	8.06E-27	1.03E-24	99.51024043	99.73035439	1.97E-89	1
ITGB1	C01	0.055645272	-0.1726978	1757684.5	0.405789682	3.45E-51	1.29E-48	7.648546144	26.00438276	0.093878154	-0.237584051	2176317	0.373256788	3.17E-89	2.31E-86	12.33303651	36.59476117	6.33E-89	1
EEF1A1	C01	4.023147198	0.190055388	2882166	0.665394287	1.40E-73	1.53E-70	100	100	4.347730428	0.135908985	3885068.5	0.666322135	6.04E-89	4.17E-86	100	100	1.21E-88	1
HLA-C	C01	2.054957191	-0.272518926	1392293	0.321433189	6.21E-86	1.02E-82	99.87357775	99.89043097	1.678732942	-0.115241823	2498770	0.428560207	5.38E-18	3.76E-16	98.75333927	99.15254237	1.24E-85	1
MT2A	C01	0.131083712	-0.124033686	1886881.5	0.435616883	3.35E-21	3.16E-19	16.30847029	28.63403944	0.306704253	-0.335372565	2064750.5	0.354122189	2.92E-82	1.91E-79	33.08103295	58.08936826	5.83E-82	1
HLA-A	C01	1.571866549	-0.316872871	1426540.5	0.329339774	6.20E-79	9.03E-76	97.91403287	99.2330168	1.792669051	-0.211582835	2206297.5	0.378398697	8.16E-49	2.49E-46	99.15405165	99.34514638	1.24E-78	1
JUN	C01	1.441850646	0.050190124	2249581.5	0.519352001	0.032845206	0.123923308	89.31731985	86.77867056	2.160213471	-0.309812996	2015004	0.345590243	4.29E-77	2.68E-74	99.15405165	99.15254237	8.58E-77	1
ZNF331	C01	0.320667069	-0.147262863	1881733.5	0.434428385	9.63E-16	5.87E-14	37.29456384	46.71292915	0.126835778	-0.229688599	2197542	0.376897055	5.44E-77	3.24E-74	16.74087266	39.67642527	1.09E-76	1
IER2	C01	0.305641225	-0.096672577	1970165	0.454844216	1.89E-08	4.63E-07	36.59924147	43.8276114	1.066094083	-0.373927348	2025962	0.347469633	2.17E-76	1.24E-73	83.9269813	90.4853621	4.34E-76	1
YWHAB	C01	0.482164642	-0.331611505	1472451.5	0.339939065	4.57E-74	5.44E-71	53.22376738	73.88604821	0.518373242	-0.14928477	2460779.5	0.422044515	6.83E-23	6.88E-21	57.30186999	67.87365177	9.14E-74	1
SQSTM1	C01	0.291842478	-0.153310174	1836413	0.42396542	9.83E-21	9.14E-19	35.96713021	47.95471147	0.284451381	-0.275311971	2128040.5	0.36497696	1.03E-71	5.39E-69	33.52626892	56.47149461	2.06E-71	1
EIF1	C01	2.48829359	-0.125133683	1714593.5	0.395841433	2.37E-30	3.89E-28	100	100	2.512403847	-0.178364096	2050782	0.351726473	2.42E-71	1.22E-68	100	100	4.85E-71	1
EZR	C01	0.340619746	-0.319904912	1508956.5	0.34836683	3.67E-70	3.70E-67	40.2022756	63.22132944	0.18371451	-0.100873873	2572820	0.441260409	1.19E-18	8.77E-17	23.86464826	34.93836672	7.34E-70	1
LINC00152	C01	0.030819133	-0.179979786	1710891.5	0.394986767	2.24E-68	2.10E-65	4.235145386	25.0182615	0.014685389	-0.093544484	2599245.5	0.445792606	2.64E-44	6.41E-42	2.092609083	12.86594761	4.49E-68	1
CD74	C01	0.327450416	-0.338423832	1523853	0.351805927	9.18E-68	8.03E-65	38.55878635	61.50474799	0.653850362	-0.198186927	2367537.5	0.406052722	2.42E-31	3.74E-29	65.89492431	76.15562404	1.84E-67	1
DUSP4	C01	0.012524391	-0.168815647	1758608	0.406002887	2.30E-67	1.89E-64	1.706700379	20.41636231	0.055219215	-0.03665348	2810595	0.482040834	1.94E-05	2.35E-04	7.524487979	10.97842835	4.60E-67	1
CLIC1	C01	0.208229554	-0.140582551	1823357	0.420951233	1.40E-24	1.68E-22	26.67509482	41.05186267	0.329460439	-0.252988929	2141737.5	0.367326111	7.26E-67	3.28E-64	39.67052538	61.40215716	1.45E-66	1
ARID5B	C01	0.245426894	-0.28545461	1553502	0.358650874	2.98E-66	2.30E-63	28.31858407	53.87143901	0.220993838	-0.101467483	2580904	0.442646883	8.89E-17	5.58E-15	27.42653606	37.98151002	5.96E-66	1
PIK3R1	C01	0.355277122	-0.313489614	1532763.5	0.353863059	4.33E-65	3.16E-62	41.4664981	63.03871439	0.164818511	-0.0476709	2753342.5	0.472221546	9.10E-06	1.20E-04	22.12822796	27.15716487	8.67E-65	1
GAPDH	C01	1.089862375	-0.289169359	1560719	0.360317034	3.57E-54	1.73E-51	87.48419722	95.10591673	1.300626864	-0.278203677	2099420	0.360068302	1.61E-64	7.05E-62	93.18788958	97.18798151	3.23E-64	1
ACTB	C01	1.692139063	-0.305657388	1505659	0.34760555	3.36E-63	2.32E-60	97.97724399	99.45215486	2.791708715	-0.114939378	2662896.5	0.456709291	1.93E-07	3.70E-06	99.82190561	99.9229584	6.72E-63	1
CLDND1	C01	0.227170807	-0.224055931	1668426.5	0.38518304	2.39E-46	8.48E-44	28.19216182	48.35646457	0.094395528	-0.176752432	2327843	0.39924478	1.24E-60	5.25E-58	13.00089047	32.28043143	2.48E-60	1
SAMSN1	C01	0.144102036	-0.214185085	1635486.5	0.377578312	9.16E-59	6.01E-56	18.52085967	41.96493791	0.083978295	-0.112937951	2509083	0.430328974	6.78E-35	1.23E-32	11.57613535	25.1540832	1.83E-58	1
TNFAIP3	C01	0.316118077	-0.311747499	1582227	0.365282502	1.98E-57	1.24E-54	36.40960809	57.37764792	0.518920592	-0.222646124	2325472.5	0.398838219	4.85E-37	9.35E-35	53.47284061	67.37288136	3.96E-57	1
EEF1G	C01	1.574766868	0.252840137	2787817	0.643612306	4.40E-57	2.62E-54	98.35651075	95.32505478	1.806716029	0.157692205	3525520	0.604656523	7.35E-37	1.40E-34	99.42119323	98.57473035	8.81E-57	1
KLF6	C01	0.556938017	-0.349798964	1555785.5	0.359178057	4.92E-57	2.81E-54	56.51074589	71.84075968	0.937494597	-0.313286039	2166402.5	0.371556367	4.53E-55	1.75E-52	77.60463045	87.13405239	9.85E-57	1
PMAIP1	C01	0.120582483	-0.23397342	1686969	0.389463874	7.27E-53	3.18E-50	15.36030341	35.93864134	0.148311681	-0.192035792	2296207.5	0.393819024	6.53E-57	2.67E-54	19.01157614	39.21417565	1.31E-56	1
TGFB1	C01	0.405183346	-0.296944195	1573213.5	0.36320159	2.75E-56	1.50E-53	46.14412137	64.97443389	0.485361065	-0.145061421	2478764	0.425129009	1.85E-21	1.65E-19	53.96260018	65.02311248	5.50E-56	1
TIGIT	C01	0.048601278	-0.061003791	2005648.5	0.463036152	1.57E-13	7.88E-12	6.700379267	13.98831264	0.051440202	-0.142223733	2436944	0.417956525	7.44E-56	2.96E-53	6.678539626	22.88135593	1.49E-55	1
SAT1	C01	0.381723649	-0.300480888	1580565.5	0.364898918	1.17E-55	6.11E-53	43.10998736	63.29437546	0.291981634	-0.231018358	2265722.5	0.388590588	6.55E-50	2.15E-47	35.48530721	53.50539291	2.33E-55	1
JUNB	C02	2.209175921	0.425590371	2685917	0.657269253	3.28E-63	1.07E-59	97.2122945	93.6323177	2.80097912	0.765856976	4258106	0.797404548	6.19E-257	8.11E-253	99.8822837	97.29557747	1.24E-256	1
ZFP36	C02	1.4060005	0.372243249	2668068	0.652901434	5.60E-61	1.47E-57	90.20729092	81.78705923	1.957783816	0.714757267	4109451.5	0.769566403	3.14E-213	2.06E-209	97.23366686	87.55965638	6.28E-213	1
NR4A2	C02	0.412942019	0.226408085	2508648	0.613889855	1.00E-51	1.64E-48	43.45961401	22.93735022	0.723081857	0.467244743	3864056	0.723611819	1.21E-181	5.27E-178	68.45203061	29.14412981	2.41E-181	1
FOS	C02	0.266233097	0.108003517	2228084	0.545233195	2.57E-12	4.11E-10	25.16082916	16.56966792	1.685115201	0.788254086	3965321.5	0.742575549	1.20E-175	3.93E-172	90.40612125	64.68342348	2.40E-175	1
FTH1	C02	2.498283842	0.472442486	2884105.5	0.705767851	6.65E-107	8.73E-103	99.71408149	98.93871962	2.348449087	0.245252969	3496896.5	0.654854805	2.23E-71	2.66E-68	99.94114185	99.68183264	1.33E-106	1
DUSP1	C02	0.633532963	0.069952138	2176727.5	0.532665774	2.29E-04	0.005692975	59.47105075	53.98836015	1.624846089	0.484705287	3680561.5	0.689249277	1.48E-106	3.89E-103	95.40906416	82.02354438	2.97E-106	1
EIF1	C02	2.727839357	0.236981065	2839302.5	0.694804133	4.46E-96	2.92E-92	100	100	2.719229235	0.171306183	3408289	0.638261507	3.47E-57	2.84E-54	100	100	8.92E-96	1
IER2	C02	0.371756944	0.007165489	2049344	0.501493829	0.856671128	1	41.1722659	41.18452585	1.552003145	0.439725194	3617934.5	0.67752128	2.62E-94	5.73E-91	93.29017069	84.28253261	5.24E-94	1
PPP1R15A	C02	0.333388787	0.121690989	2323459.5	0.56857248	4.95E-20	2.09E-17	38.09864189	24.78603218	1.121391512	0.398177418	3594724	0.673174709	3.67E-92	6.87E-89	87.1689229	64.68342348	7.33E-92	1
ZNF331	C02	0.646946934	0.344513282	2715130.5	0.664418072	3.35E-85	1.46E-81	61.90135811	34.33755563	0.419964927	0.261870741	3420675	0.640581001	1.38E-91	2.26E-88	46.0859329	19.82182628	2.75E-91	1
DUSP2	C02	0.519966828	0.158237248	2344616	0.573749675	1.07E-18	4.02E-16	51.10793424	37.72680589	0.847519877	0.382413874	3546511	0.664145985	8.21E-89	1.20E-85	71.57151265	46.48425072	1.64E-88	1
JUN	C02	1.52221786	0.165904458	2293828	0.561321372	5.10E-11	6.69E-09	90.77912795	86.23758987	2.541093945	0.330877734	3515120.5	0.658267567	3.00E-74	3.93E-71	99.70570924	98.85459752	6.00E-74	1
MT2A	C02	0.276105998	0.098217064	2242100	0.548663042	3.96E-12	6.04E-10	30.3073624	21.15713797	0.700100219	0.329047436	3407123	0.638043153	8.43E-68	9.21E-65	61.33019423	38.46643334	1.69E-67	1
H3F3B	C02	1.905918906	0.134651566	2345349.5	0.57392917	2.54E-15	5.75E-13	98.78484632	98.01437864	2.130835257	0.253231904	3448619	0.645814002	1.35E-63	1.36E-60	99.70570924	99.33184855	2.69E-63	1
ZFP36L2	C02	1.465089163	0.199134901	2377787	0.581866932	1.54E-18	5.31E-16	91.49392423	87.4015748	1.293092171	0.333927336	3432488.5	0.642793285	3.37E-62	3.16E-59	89.69982343	78.61915367	6.74E-62	1
CSRNP1	C02	0.330484078	0.140052548	2364011.5	0.578495937	7.63E-26	5.36E-23	38.8849178	24.44368367	0.539118658	0.239008973	3354784.5	0.628241857	3.02E-61	2.64E-58	58.74043555	35.5711104	6.03E-61	1
SRGN	C02	0.865322926	0.323484542	2634296.5	0.644637229	1.68E-58	3.68E-55	73.9814153	51.93426909	0.517704794	0.175052878	3162775	0.592284732	1.69E-32	7.89E-30	54.38493231	37.19376392	3.36E-58	1
TMSB10	C02	2.029373307	-0.27434781	1450287	0.354898924	4.09E-54	7.66E-51	99.42816297	99.79459089	2.983794074	-0.116104033	2138251.5	0.400424854	1.98E-30	8.10E-28	100	100	8.18E-54	1
KLF6	C02	0.993590895	0.317901701	2570388	0.628998216	1.60E-45	2.32E-42	76.7691208	61.17767888	1.226510902	0.186486285	3081997	0.577157644	2.57E-19	5.36E-17	86.75691583	80.52815781	3.19E-45	1
SOX4	C02	0.006105011	-0.024460725	1995488.5	0.488314879	1.57E-06	7.39E-05	0.714796283	3.046901746	0.320144193	-0.254099318	2085913.5	0.390623651	4.91E-44	3.79E-41	31.37139494	50.9385937	9.82E-44	1
EGR1	C02	0.008506994	0.003443093	2051091.5	0.501921459	0.168158516	0.536234782	1.000714796	0.616227319	0.209773115	0.131047456	3057218.5	0.572517438	2.48E-42	1.81E-39	23.77869335	9.513203945	4.96E-42	1
ARL4C	C02	0.595317734	0.108829585	2265995	0.554510374	5.61E-10	5.75E-08	60.25732666	51.79732968	0.68999284	0.214819944	3250562	0.608724377	4.27E-40	2.95E-37	68.80517952	51.41584473	8.55E-40	1
TNFAIP3	C02	0.5178141	0.006080852	2065563.5	0.505462894	0.529279423	0.875620704	51.10793424	49.02430674	0.791825483	0.236530748	3246678	0.607997031	1.38E-38	9.03E-36	71.10064744	55.42475342	2.75E-38	1
YPEL5	C02	0.487577682	0.124867298	2320446	0.567835048	1.32E-15	3.09E-13	54.39599714	42.9647381	0.532791003	0.192546136	3210872.5	0.601291827	5.84E-38	3.64E-35	57.26898175	40.56633789	1.17E-37	1
SLC2A3	C02	0.508349741	0.076382362	2194593	0.537037631	1.73E-05	6.17E-04	52.82344532	47.27832934	0.636819658	0.209319179	3215780	0.602210842	1.60E-36	9.52E-34	62.91936433	47.78873688	3.20E-36	1
DNAJB1	C02	0.631187351	0.021931208	2096040.5	0.512920903	0.149032922	0.506078903	65.47533953	61.9993153	0.959296571	0.223106837	3240009.5	0.606748238	1.75E-36	9.96E-34	83.04885227	70.0604518	3.49E-36	1
NDNL2	C02	0.422977714	0.093179188	2248609	0.550255856	1.50E-09	1.38E-07	48.03431022	40.05477576	0.486952961	0.180168106	3186004.5	0.596634861	6.07E-36	3.32E-33	53.32548558	36.9074133	1.21E-35	1
FOSB	C02	0.004543322	3.47E-05	2041652	0.499611524	0.761826929	1	0.571837026	0.65046217	0.107721652	0.077025249	2937328	0.550065853	6.51E-36	3.41E-33	14.12595644	4.136175628	1.30E-35	1
SELK	C02	0.668164397	0.211964012	2490505.5	0.609450214	2.07E-35	2.71E-32	67.76268763	51.62615543	0.25868176	0.039004162	2791672.5	0.522789322	0.001076672	0.024984512	32.66627428	28.60324531	4.14E-35	1
TUBB4B	C02	0.113433358	0.046313348	2164779.5	0.529741986	5.99E-09	4.63E-07	15.08220157	9.20917494	0.397062777	0.161002058	3148341	0.589581714	2.29E-34	1.15E-31	45.67392584	29.3986637	4.58E-34	1
SQSTM1	C02	0.454690257	0.097137675	2240806	0.548346388	8.07E-09	5.91E-07	49.03502502	40.94488189	0.558202608	0.194334574	3176985.5	0.594945896	1.92E-33	9.32E-31	56.03296057	40.31180401	3.84E-33	1
BTG1	C02	2.06307029	0.193227182	2499532.5	0.611659206	7.06E-33	8.42E-30	99.64260186	98.76754536	1.948813521	0.143786624	3125259.5	0.585259301	6.54E-23	1.86E-20	99.17598587	98.85459752	1.41E-32	1
NFKBIA	C02	0.910371168	-0.013383512	2016161	0.493373635	0.471520121	0.839535676	77.05503931	77.23382403	1.787525606	0.212981587	3211414	0.601393232	1.06E-31	4.81E-29	96.88051795	94.49570474	2.13E-31	1
IDI1	C02	0.416110995	0.165848169	2421932.5	0.592669753	4.91E-31	5.36E-28	47.89135096	31.32488874	0.211479518	0.062278879	2873444	0.53810246	1.26E-09	1.15E-07	26.83931725	19.50365892	9.82E-31	1
LYPD3	C02	0.080853699	0.038789166	2142982	0.524407932	1.10E-08	7.97E-07	10.72194425	5.888394385	0.163006065	0.092038647	2992703	0.560435786	5.08E-31	2.22E-28	21.71865803	9.704104359	1.02E-30	1
GIMAP7	C02	0.080069221	-0.12306623	1731088.5	0.423613703	5.56E-31	5.61E-28	10.29306648	25.4707292	0.331944361	-0.081101503	2444644	0.457802188	5.70E-08	3.83E-06	39.49381989	46.48425072	1.11E-30	1
DDX21	C02	0.584479889	0.190230028	2451163.5	0.599822855	6.89E-31	6.45E-28	61.40100071	44.71071551	0.330805816	0.027583717	2750356.5	0.515052181	0.043997092	0.309965538	39.67039435	36.9074133	1.38E-30	1
PTP4A1	C02	0.311579956	0.112659306	2306685	0.564467602	5.33E-18	1.75E-15	37.3838456	24.95720644	0.34150908	0.137929951	3104055	0.581288389	1.32E-30	5.56E-28	41.25956445	25.77155584	2.63E-30	1
CHMP1B	C02	0.065821546	0.022651169	2104090	0.514890692	3.58E-04	0.008199129	9.077912795	6.128038343	0.223981403	0.113058272	3033081	0.56799727	3.75E-30	1.49E-27	27.83990583	14.63569838	7.49E-30	1
SESN3	C02	0.409974019	0.163575528	2396574.5	0.586464411	2.92E-28	2.55E-25	44.60328806	28.58610065	0.149328978	0.06216653	2873166	0.5380504	6.56E-13	8.04E-11	19.24661566	11.77219217	5.85E-28	1
RGCC	C02	0.106572243	0.008119631	2056869	0.503335267	0.544643844	0.879313425	13.58112938	12.97500856	0.360621257	0.144566222	3086181	0.577941171	4.83E-28	1.86E-25	40.61212478	26.47152402	9.66E-28	1
FCER1G	C02	0.004543322	-0.003229344	2033258	0.497557433	0.112233764	0.441254071	0.571837026	1.061280383	0.295907647	0.137246165	3035858	0.568517312	1.62E-27	6.06E-25	30.66509712	17.53102132	3.24E-27	1
RGS1	C02	0.366217562	0.073300811	2184555	0.534581237	1.27E-05	4.67E-04	38.81343817	32.89969189	0.874475365	0.210845693	3158048.5	0.591399612	1.81E-27	6.58E-25	72.45438493	61.94718422	3.62E-27	1
CREM	C02	0.249023049	0.121117991	2336855	0.571850485	4.16E-27	3.41E-24	30.52180129	16.56966792	0.071503359	0.025793872	2763511	0.51751559	1.17E-05	5.34E-04	9.888169511	6.395163856	8.32E-27	1
HSP90AA1	C02	1.085610947	0.198663022	2443457	0.597937002	1.87E-26	1.44E-23	87.20514653	78.08969531	0.881116828	0.064217848	2846356.5	0.533029854	9.66E-05	0.003404917	78.86992348	75.53293032	3.74E-26	1
PIM3	C02	0.169729426	0.016545568	2088046.5	0.510964696	0.096816522	0.409629574	22.08720515	19.92468333	0.403124663	0.144729059	3087414.5	0.578172165	3.30E-26	1.17E-23	45.20306062	30.73496659	6.59E-26	1
IER5	C02	0.124288131	0.028453916	2110648.5	0.516495619	0.003090894	0.045279005	15.72551823	12.52995549	0.326032866	0.131057906	3059262	0.572900119	4.11E-26	1.42E-23	37.72807534	23.8625517	8.22E-26	1
FCRL3	C02	0.030512826	0.01850912	2095915	0.512890192	4.83E-07	2.59E-05	4.288777698	1.711742554	0.102725305	0.064767769	2900240	0.543120478	7.09E-26	2.38E-23	13.65509123	5.027044225	1.42E-25	1
SPRY1	C02	0.100590289	0.071073005	2214656.5	0.541947359	7.76E-26	5.36E-23	12.08005718	3.731598768	0.068855518	0.035383669	2793896.5	0.523205805	1.26E-10	1.33E-08	9.123013537	4.48615972	1.55E-25	1
ID3	C02	0.494415619	0.204328085	2382148.5	0.582934233	1.18E-25	7.71E-23	44.38884918	29.68161588	0.364917751	0.028718018	2732692	0.511744196	0.111596302	0.476395449	36.49205415	34.5847916	2.35E-25	1
S100A4	C03	1.437874842	0.877242612	2413129.5	0.821070506	4.64E-200	6.08E-196	91.13475177	52.93609672	1.665229669	0.918834449	2470070.5	0.820104572	1.52E-176	1.99E-172	92.49658936	62.76466294	9.28E-200	1
B2M	C03	3.522533819	0.335291372	2265348.5	0.770787825	2.47E-132	1.08E-128	100	100	3.712911173	0.352717367	2465622	0.818627596	5.34E-167	3.50E-163	100	100	1.07E-166	1
MIR4435-1HG	C03	0.254611066	0.216098664	1845614	0.627972606	6.68E-110	1.46E-106	30.37825059	4.979850317	0.194319452	0.18609499	1839307	0.610680578	3.79E-158	1.66E-154	23.19236016	1.095156972	7.58E-158	1
SH3BGRL3	C03	1.459929967	0.624776915	2297573.5	0.781752424	1.96E-148	1.29E-144	96.3356974	75.87795049	1.665002253	0.658503628	2424824.5	0.805082146	1.44E-157	4.73E-154	97.81718963	84.20540277	2.88E-157	1
ANXA2	C03	0.198387134	0.15817715	1753741	0.596712696	2.42E-68	1.38E-65	24.58628842	5.411629246	0.319757379	0.276343424	1973344	0.655183096	8.58E-139	2.25E-135	36.42564802	6.03553176	1.72E-138	1
LINC00152	C03	0.383649424	0.29690334	1961535	0.667414879	1.57E-116	4.11E-113	43.73522459	10.99597006	0.263464632	0.234058801	1900826.5	0.631106077	3.96E-130	8.65E-127	29.87721692	3.942565101	7.92E-130	1
S100A10	C03	0.869333784	0.331381862	1927240.5	0.65574613	2.22E-49	9.41E-47	76.8321513	57.08117444	1.424017883	0.655068136	2329647.5	0.773481796	5.27E-129	9.87E-126	93.1787176	70.45509856	1.05E-128	1
CD52	C03	1.286848001	0.580831008	2205805.5	0.75052824	2.45E-119	8.03E-116	90.30732861	67.93321819	1.993913892	0.300336262	2048539.5	0.680149255	2.30E-55	9.15E-53	100	99.02652714	4.90E-119	1
VIM	C03	1.525010592	0.435300406	1993497	0.678289992	1.35E-59	6.58E-57	93.14420804	83.79389752	1.383834975	0.643385796	2267315	0.752786367	7.40E-111	1.21E-107	89.4952251	66.26916525	1.48E-110	1
HLA-C	C03	2.518872696	0.362106552	2190335.5	0.745264552	1.85E-109	3.47E-106	100	99.85607369	1.998082743	0.303510334	2054201.5	0.682029133	1.88E-56	7.72E-54	99.86357435	98.80749574	3.70E-109	1
HLA-A	C03	2.097674268	0.404113825	2115407	0.719770031	1.40E-88	2.04E-85	99.52718676	98.5607369	2.293428062	0.456414235	2274591	0.75520212	1.07E-108	1.55E-105	99.86357435	99.14821124	2.13E-108	1
EEF1A1	C03	3.835029046	-0.084138966	1197766	0.407541466	6.52E-17	4.97E-15	100	100	4.083760589	-0.225194021	740726.5	0.245933543	8.14E-107	1.07E-103	100	100	1.63E-106	1
TNFRSF4	C03	0.067942199	0.048188975	1569371	0.533980559	1.25E-19	1.21E-17	9.456264775	2.648244099	0.225190019	0.195133986	1830081.5	0.607617558	2.49E-96	2.96E-93	25.23874488	3.918228279	4.97E-96	1
CD99	C03	0.632445131	0.244820198	1850066.5	0.629487575	1.73E-37	4.05E-35	66.43026005	44.61715602	0.863557011	0.444941817	2177280.5	0.722893412	1.64E-95	1.79E-92	80.49113233	47.94353857	3.28E-95	1
CRIP1-ENSG00000213145	C03	0.668114556	0.406295286	2015899	0.685912302	4.09E-85	4.13E-82	62.29314421	30.97294185	1.432278	0.623400679	2213898.5	0.735051199	1.98E-95	2.00E-92	89.63165075	69.11657338	3.97E-95	1
KLRB1	C03	0.37630573	0.255464688	1747221.5	0.594494427	2.08E-45	7.19E-43	28.84160757	10.42026482	0.281444519	0.245972635	1818049	0.603622567	2.24E-94	2.10E-91	24.1473397	3.62618642	4.49E-94	1
LGALS3	C03	0.144886267	0.125171481	1681023.5	0.57197047	5.53E-62	2.79E-59	16.90307329	2.590673575	0.237008773	0.199020738	1834440.5	0.609064819	1.03E-91	9.04E-89	26.19372442	4.477975176	2.07E-91	1
S100A6	C03	0.948445865	0.472306579	2086312.5	0.709870589	1.16E-89	1.90E-86	80.37825059	51.09383995	0.92997178	0.357162422	2020337	0.670785555	9.17E-54	3.44E-51	81.44611187	60.03893891	2.32E-89	1
ARPC1B	C03	0.334792799	0.196811115	1791001	0.60939046	1.10E-42	3.14E-40	38.88888889	17.93321819	1.122236206	0.47852976	2181872	0.724417867	1.76E-89	1.44E-86	87.58526603	64.46824045	3.52E-89	1
HLA-DPB1	C03	0.286108274	0.227891554	1840083.5	0.626090846	2.97E-88	3.90E-85	32.26950355	7.570523892	0.009224519	0.007875	1517414	0.503806737	6.35E-04	0.004985039	0.954979536	0.194694573	5.94E-88	1
TNFRSF18	C03	0.075719091	0.061485062	1592283	0.541776398	6.91E-32	1.28E-29	10.28368794	1.92861255	0.115442643	0.109678519	1703748	0.565672731	4.54E-88	3.50E-85	13.9154161	0.803115113	9.08E-88	1
GAPDH	C03	1.62319982	0.435311472	2107182.5	0.716971634	1.65E-87	1.96E-84	98.22695035	90.87507196	1.828455905	0.446223283	2182978	0.724785077	2.22E-85	1.53E-82	99.18144611	94.64589925	3.29E-87	1
EEF1B2	C03	1.477167432	-0.331116844	943984	0.321191805	2.48E-59	1.16E-56	95.98108747	99.10765688	1.690891275	-0.364289704	819795.5	0.272185769	4.72E-87	3.44E-84	98.49931787	99.80530543	9.44E-87	1
CD74	C03	0.941570896	0.496947618	2067140	0.70334712	4.75E-86	5.19E-83	76.47754137	47.40932642	0.99126834	0.272398293	1879092	0.623889861	2.52E-28	3.03E-26	80.21828104	69.8223412	9.50E-86	1
HLA-DRB1	C03	0.185973021	0.162861465	1734430	0.590142103	2.99E-84	2.80E-81	20.6855792	2.705814623	0.033075584	0.029027024	1560890	0.518241494	9.05E-18	5.69E-16	4.229195089	0.584083719	5.98E-84	1
LGALS1	C03	0.305650598	0.249535041	1817190.5	0.618301472	1.80E-83	1.57E-80	30.02364066	6.908462867	0.096583196	0.082823377	1631290.5	0.541615633	2.87E-33	4.59E-31	10.09549795	1.825261621	3.60E-83	1
HLA-DPA1	C03	0.202129015	0.168804568	1767652	0.601445932	3.32E-81	2.72E-78	24.58628842	4.43293034	0.018449039	0.013120972	1527544	0.507170066	2.65E-04	0.002383692	2.182810368	0.75444147	6.65E-81	1
PFN1	C03	1.39688607	0.411699819	2062226.5	0.701675295	1.10E-76	7.98E-74	94.20803783	84.31203224	2.304899269	0.355721977	2163494.5	0.718316231	5.23E-80	3.43E-77	100	99.68362132	1.05E-79	1
HLA-B	C03	2.733610336	0.302349294	2078994.5	0.70738063	1.29E-78	9.95E-76	100	99.94242948	2.231563664	0.260264212	2023236	0.671748071	2.92E-50	9.80E-48	99.86357435	99.58627403	2.58E-78	1
COTL1	C03	0.597910634	0.345845755	1980794.5	0.67396795	2.87E-76	1.98E-73	60.52009456	29.76396085	1.015304553	0.350968883	2017970.5	0.669999837	3.48E-52	1.23E-49	83.62892224	66.65855439	5.75E-76	1
CCR6	C03	0.296177212	0.223397499	1820858.5	0.619549514	5.21E-76	3.42E-73	32.03309693	8.462867012	0.075900716	0.072329561	1648636	0.547374628	2.05E-66	1.17E-63	9.959072306	0.486736432	1.04E-75	1
CLIC1	C03	0.395387369	0.121936308	1670441	0.568369761	3.08E-13	1.57E-11	45.98108747	33.30454807	0.798075958	0.392376997	2099377	0.697028152	6.46E-76	4.03E-73	76.1255116	46.89705524	1.29E-75	1
IL32	C03	1.020061276	0.456916796	2024142	0.688716994	5.62E-71	3.51E-68	79.78723404	56.5054692	1.768497124	0.431934627	2046391	0.679435917	4.82E-55	1.86E-52	96.3165075	92.33390119	1.12E-70	1
DUSP4	C03	0.287553114	0.208954186	1807418	0.614976366	2.33E-68	1.38E-65	31.91489362	9.096142775	0.14333104	0.080672918	1622410.5	0.538667325	3.82E-11	1.27E-09	15.68894952	8.250182526	4.65E-68	1
CLDND1	C03	0.566531907	0.245415893	1837708	0.625282579	8.91E-38	2.12E-35	59.10165485	36.55728267	0.420501462	0.272610274	1948972.5	0.647091351	1.44E-66	8.58E-64	46.65757162	19.17741543	2.88E-66	1
SRGN	C03	0.847622933	0.249981111	1800265.5	0.612542719	1.92E-26	2.77E-24	75.05910165	55.18134715	0.720156843	0.372466297	2040803	0.677580608	5.79E-66	3.16E-63	68.07639836	38.79289365	1.16E-65	1
PRDM1	C03	0.194352122	0.107295549	1669918	0.568191809	7.99E-26	1.09E-23	24.11347518	10.47783535	0.16313205	0.132974591	1763130.5	0.58538871	4.16E-65	2.18E-62	21.14597544	4.112922852	8.33E-65	1
TTC39C	C03	0.618350417	0.331761828	1947529.5	0.662649489	7.03E-64	3.84E-61	61.11111111	33.79389752	0.232039367	0.051876614	1595534.5	0.529744045	5.91E-04	0.004688614	29.05866303	23.55804332	1.41E-63	1
S100A11	C03	0.116701254	0.067825018	1595274.5	0.54279426	2.24E-16	1.60E-14	14.89361702	6.36154289	0.329303271	0.226496972	1886993	0.626513124	1.99E-62	1.00E-59	37.65347885	13.53127282	3.97E-62	1
ACTB	C03	2.177157801	0.362231151	2008719	0.683469298	3.49E-62	1.83E-59	99.52718676	98.76223374	3.144248178	0.342811743	1985954	0.659369826	3.62E-43	1.01E-40	100	99.85397907	6.97E-62	1
SOX4	C03	0.043100082	0.025437228	1515969.5	0.515810628	3.57E-08	8.58E-07	4.846335697	1.669545193	0.155145826	-0.388794415	981896.5	0.326006002	4.35E-62	2.11E-59	15.41609823	49.18471648	8.71E-62	1
FANK1	C03	0.014407763	0.011614423	1493116	0.508034695	6.87E-07	1.31E-05	2.009456265	0.402993667	0.064392463	0.061664758	1631927.5	0.541827128	6.33E-61	2.97E-58	8.731241473	0.365052324	1.27E-60	1
AHNAK	C03	0.322834361	0.141498348	1688368.5	0.574469616	2.06E-19	1.92E-17	35.46099291	21.30109384	0.508027312	0.298633441	1964356.5	0.652199096	7.69E-61	3.48E-58	53.06957708	25.09126308	1.54E-60	1
ITGB1	C03	0.319403451	0.19187932	1793709.5	0.610312031	9.61E-48	3.94E-45	36.76122931	15.02590674	0.462018472	0.28371069	1929741.5	0.640706339	1.76E-57	7.68E-55	47.33969986	21.41640302	3.51E-57	1
IFITM1	C03	1.070234683	-0.065391233	1396985	0.475325995	0.023885261	0.101222522	79.66903073	87.91018998	1.19237203	-0.557059699	955995.5	0.317406439	1.71E-56	7.24E-54	75.71623465	97.39596009	3.42E-56	1
TGFB1	C03	0.87012659	0.344134027	1946336	0.662243399	8.39E-54	3.79E-51	78.36879433	53.13759355	0.759015173	0.230823495	1853917.5	0.615531507	5.05E-26	5.34E-24	71.48703956	57.82428815	1.68E-53	1
TMSB10	C03	2.47906358	0.3285239	1969703	0.670194052	1.46E-53	6.36E-51	99.76359338	99.65457686	3.128549896	0.081769948	1706156.5	0.566472393	9.03E-09	2.10E-07	100	100	2.91E-53	1
EMP3	C03	0.676457111	0.208373331	1792144	0.609779367	2.91E-26	4.15E-24	69.5035461	52.27403569	1.01199248	0.330181493	2020800	0.670939278	8.73E-53	3.18E-50	84.17462483	69.57897299	1.75E-52	1
NCF4	C03	0.09859853	0.064543794	1591526	0.541518827	7.39E-19	6.38E-17	13.00236407	4.749568221	0.20822097	0.148373798	1792746	0.59522155	6.19E-52	2.14E-49	27.01227831	8.15283524	1.24E-51	1
MYO1F	C03	0.069920894	0.053126955	1579024.5	0.537265176	3.63E-24	4.67E-22	9.810874704	2.36039148	0.076203601	0.067909127	1648603.5	0.547363837	8.28E-50	2.71E-47	10.64120055	1.168167437	1.66E-49	1
EEF1A1	C04	3.211571161	-0.734474004	66484.5	0.06413863	5.14E-121	6.74E-117	100	100	3.854746122	-0.425834265	58132	0.187217597	4.04E-18	1.77E-14	100	100	1.03E-120	1
FAU	C04	1.808429337	-0.545135518	158413.5	0.152823964	5.19E-78	3.40E-74	99.60784314	100	2.211778293	-0.209288351	98631	0.317647059	3.81E-07	7.92E-05	100	100	1.04E-77	1
SYNE2	C04	0.92716303	0.716345134	795538	0.767467863	5.02E-74	2.20E-70	68.62745098	25.58425584	0.382102215	0.263810875	202289	0.651483873	2.91E-11	3.18E-08	44.61538462	15.32342474	1.00E-73	1
PRDM1	C04	0.491222973	0.407189868	724106	0.698556303	8.98E-74	2.94E-70	49.01960784	10.89790898	0.178670816	0.130130061	178998.5	0.576475419	9.59E-07	1.59E-04	21.53846154	6.489428512	1.80E-73	1
NACA	C04	1.501687233	-0.563606109	170774.5	0.164748812	4.39E-73	1.15E-69	99.60784314	99.92619926	1.933953013	-0.255932789	95398.5	0.307236598	7.78E-08	2.17E-05	100	99.91626544	8.77E-73	1
TPT1	C04	2.56117852	-0.515563208	169990	0.163991993	8.15E-73	1.78E-69	100	100	3.174921458	-0.195310847	100234	0.322809617	8.71E-07	1.46E-04	100	100	1.63E-72	1
GNB2L1	C04	1.590993982	-0.527665056	171794.5	0.165732822	1.36E-72	2.56E-69	100	99.97539975	2.166765551	-0.117397154	126420.5	0.407144812	0.009687984	0.13130242	100	99.97906636	2.73E-72	1
PTPRC	C04	1.485285059	0.752794835	850667.5	0.820652148	2.51E-70	4.12E-67	91.37254902	71.3899139	1.220680694	0.294976776	203267	0.654633581	1.15E-05	0.001073089	90.76923077	81.36906008	5.03E-70	1
HLA-B	C04	3.003807281	0.545538068	858928	0.82862118	7.72E-70	1.13E-66	100	99.95079951	2.193460433	0.185248022	192746	0.620750068	7.64E-04	0.022880085	100	99.62319447	1.54E-69	1
UBA52	C04	1.009161365	-0.566279937	195900	0.188987772	1.11E-63	1.45E-60	94.90196078	98.22878229	1.701609127	-0.145530957	121460	0.391169224	0.002356932	0.049601494	100	99.60226083	2.21E-63	1
FTL	C04	1.243672658	-0.606453448	197588.5	0.190616694	2.15E-62	2.56E-59	96.8627451	98.47478475	1.656077389	-0.196684464	127464.5	0.410507077	0.012655998	0.152231914	96.92307692	98.74398158	4.30E-62	1
HLA-C	C04	2.71119231	0.513844746	832500.5	0.803126161	7.73E-60	8.45E-57	100	99.87699877	1.944992057	0.207255362	195650	0.630102575	2.80E-04	0.010912188	100	98.95331798	1.55E-59	1
LCP1	C04	0.740918962	0.535006582	765565	0.738552444	8.94E-60	9.02E-57	65.49019608	25.46125461	0.557166299	0.301820056	202834.5	0.653240689	1.99E-07	5.11E-05	56.92307692	31.3795269	1.79E-59	1
B2M	C04	3.680398277	0.454311608	832833	0.803446929	1.14E-59	1.07E-56	100	100	3.412924248	-6.74E-04	162383.5	0.522965814	0.523879143	0.927875839	100	100	2.29E-59	1
EEF1B2	C04	1.214577341	-0.562039141	210333.5	0.202911994	8.15E-58	7.13E-55	97.64705882	98.54858549	1.62197978	-0.383197792	85004	0.273760487	2.86E-10	2.09E-07	98.46153846	99.62319447	1.63E-57	1
TTN	C04	0.497193949	0.413955958	690507	0.666142826	5.16E-55	4.23E-52	41.96078431	10.4797048	0.237043738	0.165171625	183848.5	0.592095135	7.23E-07	1.28E-04	27.69230769	9.566673645	1.03E-54	1
PFDN5	C04	0.87855613	-0.479303614	227304.5	0.219284181	1.14E-52	8.82E-50	90.98039216	96.23616236	1.231832579	-0.177762008	125009	0.402598992	0.006181636	0.095574793	93.84615385	96.81808667	2.29E-52	1
HLA-A	C04	2.299687206	0.560046081	811452	0.782820346	1.66E-52	1.21E-49	99.60784314	98.69618696	2.158439441	0.255765373	197812	0.637065426	1.34E-04	0.006717343	100	99.24638895	3.31E-52	1
CCR4	C04	0.168325526	0.145848902	618584.5	0.596758073	4.14E-51	2.85E-48	22.35294118	3.001230012	0.048893136	0.028600824	160557.5	0.517085071	0.097770715	0.518346887	6.153846154	2.763240528	8.27E-51	1
ETS1	C04	1.070731626	0.589707719	787802	0.760004824	2.69E-50	1.70E-47	81.17647059	53.13653137	1.360049593	0.47970655	225409.5	0.725944832	1.40E-10	1.15E-07	96.92307692	78.73142139	5.37E-50	1
HLA-E	C04	2.065283209	0.50979655	804090.5	0.775718592	2.72E-50	1.70E-47	100	97.49077491	1.74894603	0.116897739	176754	0.569246872	0.052860637	0.364941008	98.46153846	98.30437513	5.44E-50	1
PIK3R1	C04	1.157499247	0.641393608	786172.5	0.75843282	3.62E-49	2.15E-46	81.56862745	53.48093481	0.360774609	0.172716301	186132.5	0.599450895	2.46E-04	0.010586336	43.07692308	24.57609378	7.23E-49	1
SNRPD2	C04	0.157710147	-0.49455454	249067	0.240278803	3.06E-48	1.74E-45	19.21568627	68.04428044	0.682518101	-0.153315705	130967	0.421787089	0.025473668	0.232777606	66.15384615	78.73142139	6.11E-48	1
STAM	C04	0.63871714	0.433965203	738186	0.712139498	2.06E-47	1.12E-44	62.74509804	26.00246002	0.247079511	0.164831498	190420.5	0.613260656	1.24E-08	5.25E-06	33.84615385	11.13669667	4.11E-47	1
COMMD6	C04	0.298196011	-0.544203437	248743.5	0.239966717	9.43E-47	4.94E-44	31.37254902	78.86838868	0.950877568	-0.127789559	132036.5	0.425231478	0.034167809	0.2831695	86.15384615	89.51224618	1.89E-46	1
NBEAL1	C04	0.344916433	-0.541250988	249086	0.240297132	2.06E-46	1.04E-43	38.03921569	80.61500615	0.760983447	-0.124667483	135943	0.437812596	0.07697082	0.451761324	69.23076923	80.07117438	4.11E-46	1
ITGB1	C04	0.551188357	0.410307392	707325	0.682367412	4.37E-46	2.12E-43	50.58823529	17.31857319	0.431186467	0.212785986	193446.5	0.623006071	7.28E-06	7.99E-04	49.23076923	25.01570023	8.74E-46	1
TMSB10	C04	1.745452947	-0.498869842	245526.5	0.236863227	1.94E-45	9.09E-43	99.60784314	99.6801968	3.124394663	0.066123734	167505	0.539459912	0.27327976	0.824999063	100	100	3.88E-45	1
AHNAK	C04	0.616368467	0.432873947	721997.5	0.696522201	2.83E-45	1.28E-42	56.8627451	22.01722017	0.810414967	0.563375723	224786.5	0.723938423	7.62E-15	2.50E-11	66.15384615	28.82562278	5.66E-45	1
C12orf57	C04	0.327377066	-0.545669539	253628	0.24467887	8.31E-45	3.63E-42	36.47058824	78.22878229	0.78497605	-0.168132996	130123.5	0.419070546	0.021781374	0.21536621	75.38461538	82.56227758	1.66E-44	1
SGMS1	C04	0.201153019	0.166933937	626427.5	0.604324337	4.84E-42	2.05E-39	25.49019608	4.79704797	0.117301831	0.081979244	173763	0.559614177	1.49E-05	0.001284132	16.92307692	4.961272765	9.69E-42	1
EEF1G	C04	0.990627834	-0.45048077	261635.5	0.25240383	4.08E-41	1.67E-38	91.76470588	96.72816728	1.453984161	-0.271835617	108350	0.348947682	2.40E-05	0.001837632	95.38461538	99.0161189	8.15E-41	1
EEF1D	C04	1.238772619	-0.403299965	262577	0.25331211	1.02E-40	4.04E-38	97.25490196	98.86838868	1.409104384	-0.225614693	114256	0.36796831	2.17E-04	0.009596493	96.92307692	98.5974461	2.03E-40	1
UTRN	C04	0.484720118	0.334609917	701286	0.676541495	4.56E-40	1.76E-37	52.54901961	19.55719557	0.300398524	0.197904676	191974	0.618263796	5.60E-08	1.67E-05	36.92307692	13.81620264	9.12E-40	1
ZFAS1	C04	0.31153404	-0.495603254	273707	0.264049393	7.69E-39	2.88E-36	32.94117647	75.47355474	0.517298673	-0.127487613	133742.5	0.430725753	0.044734848	0.330619271	58.46153846	66.67364455	1.54E-38	1
BTF3	C04	1.077601655	-0.410827528	270013	0.260485734	1.36E-38	4.95E-36	94.90196078	97.93357934	1.456666521	-0.083822759	133117.5	0.428712903	0.045418838	0.333980024	100	98.03223781	2.72E-38	1
TMA7	C04	0.742479509	-0.418447297	276591	0.266831633	2.74E-37	9.71E-35	78.43137255	92.27552276	1.085149654	-0.086119996	140945	0.453921837	0.192289472	0.722386721	90.76923077	93.13376596	5.48E-37	1
EIF3A	C04	0.725390787	0.424717344	731049	0.705254323	3.85E-37	1.33E-34	69.01960784	36.77736777	0.442460938	0.222416928	192978	0.621497238	1.82E-05	0.001500545	50.76923077	27.86267532	7.70E-37	1
BACH1	C04	0.374062711	0.275423743	668147.5	0.644572269	1.00E-35	3.38E-33	40.78431373	13.5301353	0.117301831	0.086116039	174608.5	0.56233716	1.91E-06	2.75E-04	16.92307692	4.437931756	2.01E-35	1
EIF4G2	C04	0.761434071	0.435142004	729642.5	0.703897451	1.19E-35	3.90E-33	69.80392157	38.96678967	0.517944066	0.168436383	182084	0.586412457	0.006559007	0.100205811	55.38461538	41.67887796	2.38E-35	1
SNHG8	C04	0.321021254	-0.474625659	286933.5	0.276809203	5.57E-35	1.78E-32	32.15686275	74.83394834	0.378669237	-0.128179619	133572	0.430176648	0.038265727	0.301684871	44.61538462	56.26962529	1.11E-34	1
HIST1H1E	C04	0.69505683	0.455027104	704868.5	0.679997588	6.93E-34	2.16E-31	56.07843137	27.13407134	0.806483617	0.548829583	214030	0.689296469	4.11E-11	3.84E-08	58.46153846	28.44881725	1.39E-33	1
FAM46C	C04	0.63463676	0.391078049	706486	0.681558016	1.23E-32	3.74E-30	59.21568627	30.06150062	0.238227755	0.117986995	177412	0.571366001	0.001595232	0.037549529	29.23076923	15.23969018	2.45E-32	1
BTG2	C04	1.173628436	0.512922054	739428	0.713337675	1.46E-32	4.34E-30	81.96078431	63.78843788	0.913641135	0.152738773	176092	0.567114861	0.055189225	0.37695328	75.38461538	69.9183588	2.91E-32	1
DDX5	C04	1.370972844	0.447790656	742721	0.716514483	1.96E-32	5.71E-30	90.98039216	80.61500615	1.494169006	0.218047774	197276.5	0.635340816	1.44E-04	0.007015157	92.30769231	92.96629684	3.92E-32	1
EIF3E	C04	0.334154907	-0.440775345	299339.5	0.288777464	1.43E-31	4.07E-29	34.50980392	73.40713407	0.852146045	-0.06894187	145116.5	0.467356403	0.353695973	0.887159276	78.46153846	82.14360477	2.86E-31	1
TOMM7	C04	0.507716931	-0.444859393	299655	0.289081832	5.22E-31	1.46E-28	51.37254902	83.49323493	1.155639965	-0.095963223	144443	0.465187356	0.326391026	0.87302065	86.15384615	94.09671342	1.04E-30	1
PAG1	C04	0.382013007	0.266414693	663006.5	0.639612667	5.93E-31	1.62E-28	41.56862745	15.12915129	0.242653633	0.112192997	176575.5	0.568672002	0.004014916	0.071730652	30.76923077	17.50052334	1.19E-30	1
TNFAIP3	C04	0.993766878	0.510179132	722993	0.697482575	2.24E-30	5.99E-28	71.76470588	48.31488315	0.974904895	0.341194611	203220	0.654482214	7.43E-06	8.05E-04	78.46153846	60.6866234	4.48E-30	1
SMCHD1	C04	0.953188092	0.468565005	724597.5	0.699030461	3.09E-30	8.09E-28	75.68627451	53.67773678	0.639043744	0.334159584	209790.5	0.675642904	1.36E-08	5.41E-06	66.15384615	37.22001256	6.17E-30	1
SNORD3B-1	C05	0.361437516	0.358136029	374680.5	0.737445358	0	0	47.9338843	0.476303882	0.586921311	0.565493168	228717.5	0.838576326	8.01E-155	1.05E-150	70.1754386	3.03030303	0	1
SNORD3A	C05	0.608211911	0.574658129	428927	0.844213203	6.03E-198	3.96E-194	72.72727273	4.715408431	0.861946765	0.806105041	249367	0.914286238	4.14E-111	2.71E-107	87.71929825	7.460815047	1.21E-197	1
TMEM107	C05	0.127973587	0.117545853	290285	0.571338315	3.91E-30	1.71E-26	15.70247934	1.476542034	0.210860845	0.157139946	160492	0.588432419	5.52E-07	2.68E-04	24.56140351	7.398119122	7.83E-30	1
RNU12	C05	0.028642445	0.01927367	261202	0.514097217	0.008995936	0.42746468	4.132231405	1.309835675	0.326286304	0.284211599	177402	0.650431722	3.82E-21	1.67E-17	35.0877193	5.747126437	7.65E-21	1
SNORD3D	C05	0.011456978	0.010631606	257936	0.507669083	3.56E-05	0.01013357	1.652892562	0.11907597	0.080076284	0.076165109	149971.5	0.549859759	9.42E-20	3.09E-16	10.52631579	0.564263323	1.88E-19	1
SNORD3C	C05	0.017185467	0.015864873	259854	0.511444086	8.47E-07	5.29E-04	2.479338843	0.190521553	0.060802384	0.057905217	147765	0.541769785	2.19E-18	5.75E-15	8.771929825	0.417972832	4.38E-18	1
IFNG-AS1	C05	0.061609256	0.056628975	271215	0.533804782	4.12E-15	1.35E-11	7.438016529	0.690640629	0.012160477	0.004083916	137252.5	0.503226457	0.644891331	0.954724235	1.754385965	1.107628004	8.24E-15	1
LRRC27	C05	0.017185467	0.016855319	260217	0.512158542	8.86E-15	2.32E-11	2.479338843	0.047630388	0	-0.005696109	135289.5	0.496029258	0.499626758	0.954724235	0	0.79414838	1.77E-14	1
GZMK	C05	0.097927017	0.08385443	275509	0.542256224	1.64E-12	3.58E-09	9.917355372	1.476542034	0.07502923	0.059591633	146122	0.535745843	3.21E-05	0.007952632	8.771929825	1.609195402	3.28E-12	1
GEN1	C05	0	-0.002806264	253011	0.497975709	0.483383782	0.995892961	0	0.4048583	0.036481431	0.034887989	143236.5	0.525166364	2.00E-12	4.38E-09	5.263157895	0.229885057	4.01E-12	1
FAM157A	C05	0	-0.005117305	252164	0.496308645	0.343033564	0.995892961	0	0.738271017	0.036481431	0.034598272	143179.5	0.524957378	6.73E-11	1.26E-07	5.263157895	0.271682341	1.35E-10	1
CSRNP2	C05	0	-0.004126859	252527	0.497023101	0.394851877	0.995892961	0	0.595379852	0.067915807	0.062556048	147299	0.540061229	8.94E-11	1.47E-07	8.771929825	0.773249739	1.79E-10	1
PTCH2	C05	0.053400563	0.039478218	263847	0.519303101	0.003209466	0.250472084	5.785123967	1.952845916	0.223021321	0.17806034	164469.5	0.603015637	2.11E-10	3.08E-07	26.31578947	6.081504702	4.22E-10	1
GNAS-AS1	C05	0	0	254039.5	0.5	1	1	0	0	0.024320954	0.023451804	140986.5	0.5169169	4.08E-10	5.35E-07	3.50877193	0.12539185	8.16E-10	1
TMEM237	C05	0.017185467	0.016263533	260034	0.511798362	2.67E-09	4.99E-06	2.479338843	0.11907597	0.031434377	0.026509193	140205.5	0.51405342	0.014087053	0.319443791	3.50877193	0.710553814	5.33E-09	1
RP3-330M21.5	C05	0	-8.25E-04	253737	0.49940462	0.704591802	0.995892961	0	0.11907597	0.036481431	0.034163697	143094	0.524643898	3.30E-09	3.64E-06	5.263157895	0.334378265	6.60E-09	1
RP11-246A10.1	C05	0	0	254039.5	0.5	1	1	0	0	0.036481431	0.03407896	143092.5	0.524638399	3.33E-09	3.64E-06	5.263157895	0.334378265	6.66E-09	1
PPP1R10	C05	0.058258304	0.016656342	258357.5	0.508498678	0.432583713	0.995892961	7.438016529	5.810907359	0.334531982	0.243041193	171813	0.629940054	4.64E-09	4.68E-06	36.84210526	12.37199582	9.29E-09	1
TMEM8B	C05	0.005728489	-2.14E-04	253961	0.499845496	0.971178544	1	0.826446281	0.857346987	0.060802384	0.054114285	147047.5	0.539139123	6.22E-09	5.83E-06	8.771929825	0.940438871	1.24E-08	1
TMEM217	C05	0.005728489	0.004738043	255776	0.503417776	0.065427306	0.84845339	0.826446281	0.142891165	0.036481431	0.033934102	143064	0.524533905	9.42E-09	8.23E-06	5.263157895	0.355276907	1.88E-08	1
RP11-239E10.2	C05	0	0	254039.5	0.5	1	1	0	0	0.036481431	0.03387398	143037	0.524434912	2.40E-08	1.97E-05	5.263157895	0.376175549	4.80E-08	1
WDR74	C05	0.316592343	0.184401302	304417.5	0.599153872	2.78E-08	4.55E-05	35.53719008	17.7423196	0.528683532	0.337075555	180208	0.66071972	3.19E-08	2.43E-05	52.63157895	24.74399164	5.56E-08	1
AC012358.8	C05	0	0	254039.5	0.5	1	1	0	0	0.024320954	0.023162087	140929.5	0.516707914	3.33E-08	2.43E-05	3.50877193	0.167189133	6.66E-08	1
EGR1	C05	0.041072837	0.035899432	265068.5	0.521707254	4.02E-08	5.86E-05	4.958677686	0.619195046	0.351323433	0.229314274	163813	0.600608627	1.91E-05	0.005111271	33.33333333	14.29467085	8.04E-08	1
RP11-367N14.2	C05	0	-9.90E-04	253676.5	0.499285544	0.677791931	0.995892961	0	0.142891165	0.036481431	0.033644385	143007	0.524324919	5.69E-08	3.93E-05	5.263157895	0.39707419	1.14E-07	1
CCDC7	C05	0.017185467	2.23E-04	254223	0.500361164	0.959356734	1	2.479338843	2.405334603	0.121604769	0.095770753	155261.5	0.569255165	6.37E-08	4.18E-05	17.54385965	3.67816092	1.27E-07	1
USP31	C05	0.022913956	0.020933064	261711.5	0.515100014	7.02E-08	9.21E-05	3.305785124	0.285782329	0.012160477	0.009178573	138194.5	0.506680232	0.127171465	0.883939952	1.754385965	0.417972832	1.40E-07	1
JUN	C05	1.805314448	0.406664487	326230	0.642085188	8.05E-08	9.59E-05	94.21487603	87.52083829	2.689761826	0.367774001	181935.5	0.667053475	1.37E-05	0.003902943	100	99.14315569	1.61E-07	1
FTH1	C05	1.869652454	-0.318095522	182341.5	0.35888415	1.09E-07	1.19E-04	98.34710744	99.21409859	2.120846567	-0.069220757	124555.5	0.456673816	0.258665981	0.954724235	100	99.77011494	2.18E-07	1
RP11-135A24.4	C05	0	0	254039.5	0.5	1	1	0	0	0.036481431	0.033584264	142980	0.524225925	1.24E-07	7.73E-05	5.263157895	0.417972832	2.48E-07	1
AC026202.1	C05	0.011456978	0.009476086	257512.5	0.506835551	0.009109077	0.42746468	1.652892562	0.285782329	0.024320954	0.023017229	140901	0.516603421	1.66E-07	9.90E-05	3.50877193	0.188087774	3.32E-07	1
ZNF528	C05	0.028642445	0.025147834	263322	0.518269797	1.76E-07	1.77E-04	4.132231405	0.476303882	0	-0.008112067	134776.5	0.49414838	0.411557282	0.954724235	0	1.170323929	3.52E-07	1
TTC12	C05	0.066364331	0.052139887	272023	0.535395086	1.92E-07	1.79E-04	9.090909091	2.024291498	0.012160477	0.00404841	137169	0.50292031	0.684661795	0.954724235	1.754385965	1.170323929	3.83E-07	1
MIR4453	C05	0.011456978	0.007660268	256847	0.505525715	0.1142008	0.976823005	1.652892562	0.547749464	0.048641907	0.043427007	144916.5	0.531325964	2.06E-07	1.13E-04	7.01754386	0.752351097	4.11E-07	1
USP44	C05	0	-0.003466561	252769	0.497499405	0.435739675	0.995892961	0	0.500119076	0.048641907	0.04334227	144914.5	0.531318631	2.07E-07	1.13E-04	7.01754386	0.752351097	4.14E-07	1
S100A4	C05	0.404794552	-0.337072165	188159.5	0.370335125	4.04E-07	3.16E-04	41.32231405	60.96689688	0.789338338	-0.097298866	127326.5	0.466833489	0.377112866	0.954724235	66.66666667	67.27272727	8.07E-07	1
TNNC1	C05	0.011456978	0.010961755	258057	0.507907235	4.58E-07	3.16E-04	1.652892562	0.071445582	0	0	136372.5	0.5	1	1	0	0	9.17E-07	1
TRIM74	C05	0.011456978	0.010961755	258057	0.507907235	4.58E-07	3.16E-04	1.652892562	0.071445582	0	-0.001014008	136173	0.499268548	0.773177988	0.954724235	0	0.146290491	9.17E-07	1
OCRL	C05	0.011456978	0.010961755	258057	0.507907235	4.58E-07	3.16E-04	1.652892562	0.071445582	0	-0.002462592	135888	0.498223615	0.652502705	0.954724235	0	0.355276907	9.17E-07	1
FAM171A1	C05	0.011456978	0.010961755	258057	0.507907235	4.58E-07	3.16E-04	1.652892562	0.071445582	0.012160477	0.007669868	137881.5	0.50553264	0.305597185	0.954724235	1.754385965	0.647857889	9.17E-07	1
ICA1L	C05	0	-0.002971338	252950.5	0.497856633	0.470729286	0.995892961	0	0.428673494	0.036481431	0.033294547	142923	0.524016939	4.92E-07	2.50E-04	5.263157895	0.459770115	9.85E-07	1
RP3-403L10.3	C05	0.005728489	0.004738043	255776	0.503417776	0.065427306	0.84845339	0.826446281	0.142891165	0.036481431	0.03320981	142921.5	0.524011439	4.95E-07	2.50E-04	5.263157895	0.459770115	9.91E-07	1
NPR2	C05	0	0	254039.5	0.5	1	1	0	0	0.024320954	0.02287237	140872.5	0.516498928	6.36E-07	2.88E-04	3.50877193	0.208986416	1.27E-06	1
PRB3	C05	0	0	254039.5	0.5	1	1	0	0	0.024320954	0.02287237	140872.5	0.516498928	6.36E-07	2.88E-04	3.50877193	0.208986416	1.27E-06	1
SNORD3B-2	C05	0.022913956	0.018456949	260804	0.513313874	6.25E-04	0.092061048	3.305785124	0.643010241	0.080076284	0.067968305	148400.5	0.5440998	8.33E-07	3.64E-04	10.52631579	1.734587252	1.67E-06	1
SRGN	C05	0.374645317	-0.279787789	190370.5	0.374686811	8.38E-07	5.29E-04	42.14876033	59.56180043	0.41760875	0.013694075	139343	0.510891125	0.751582094	0.954724235	43.85964912	43.2183908	1.68E-06	1
IFNG	C05	0.005728489	-0.001659395	253716	0.499363288	0.886923753	1	0.826446281	0.952607764	0.043594854	0.03979539	142900.5	0.523934444	8.87E-07	3.75E-04	5.263157895	0.480668757	1.77E-06	1
RP11-386I14.4	C05	0.105930379	0.073008576	274662	0.54058916	2.57E-05	0.009103686	12.39669421	4.358180519	0.331551297	0.231056093	166381	0.610024015	9.72E-07	3.90E-04	33.33333333	12.78996865	1.94E-06	1
C12orf57	C05	0.974744257	0.137766036	286649.5	0.564182932	0.013446001	0.492726301	84.29752066	75.51798047	1.340905774	0.394700187	186625.5	0.684249024	9.82E-07	3.90E-04	94.73684211	82.31974922	1.96E-06	1
RP11-755B10.4	C05	0.011456978	0.006243111	256362	0.50457114	0.254965292	0.995892961	1.652892562	0.738271017	0.111510661	0.090626444	151572	0.555727878	1.50E-06	5.77E-04	14.03508772	2.988505747	2.99E-06	1
CCL5	C06	1.046791743	1.041308782	421527.5	0.857197037	0	0	71.79487179	0.642398287	0.541838153	0.539023419	155705	0.77234623	0	0	54.76190476	0.333333333	0	1
GZMK	C06	0.392932603	0.386992358	341010.5	0.693461732	4.71E-222	3.09E-218	39.31623932	0.666190816	0.834856015	0.825880679	174441.5	0.865285218	3.76E-292	2.46E-288	73.80952381	1.0625	7.51E-292	1
CXCR3	C06	0.40428812	0.384650031	355653.5	0.723238997	7.19E-138	3.14E-134	47.00854701	2.569593148	0.387993673	0.372659311	142237	0.705540675	4.43E-69	1.94E-65	42.85714286	1.979166667	1.44E-137	1
LYAR	C06	0.520915324	0.487514746	377616	0.767900828	8.27E-131	2.71E-127	57.26495726	4.425410421	0.342528375	0.289694794	134947	0.66937996	1.27E-16	1.38E-13	40.47619048	7.25	1.65E-130	1
NKG7	C06	0.173684495	0.173189744	281440.5	0.572323188	2.22E-114	5.83E-111	14.52991453	0.071377587	0.033007009	0.031274141	105348	0.522559524	5.93E-08	2.37E-05	4.761904762	0.25	4.44E-114	1
BHLHE40	C06	0.336593511	0.320963572	333738	0.678672743	6.50E-112	1.42E-108	37.60683761	1.998572448	0.033007009	0.024149187	104377	0.517743056	0.038516133	0.394995723	4.761904762	1.208333333	1.30E-111	1
HOPX	C06	0.20098195	0.194948459	304901.5	0.620032293	2.96E-101	5.54E-98	24.78632479	0.808945991	0	-0.003779085	100275	0.497395833	0.639481508	0.947229325	0	0.520833333	5.92E-101	1
GZMA	C06	0.243914068	0.235226277	308488	0.627325618	7.42E-95	1.22E-91	26.4957265	1.070663812	0.614326783	0.508405925	146014.5	0.724278274	1.67E-18	1.99E-15	54.76190476	11.97916667	1.48E-94	1
GNLY	C06	0.279410783	0.27766514	279087	0.567537229	1.01E-83	1.47E-80	13.67521368	0.190340233	0	0	100800	0.5	1	1	0	0	2.02E-83	1
CDKN1A	C06	0.570325342	0.49430552	360096.5	0.732274057	2.91E-61	3.81E-58	53.84615385	8.755650726	0.196801194	0.108820164	112421	0.557643849	0.0152581	0.233711313	21.42857143	10.375	5.81E-61	1
IFNG	C06	0.044935858	0.038640979	256460	0.521524105	2.18E-06	1.48E-04	5.128205128	0.83273852	0.163498412	0.160623744	119632	0.593412698	4.10E-61	1.34E-57	19.04761905	0.375	8.20E-61	1
GZMH	C06	0.069088279	0.069088279	260586	0.52991453	1.06E-56	1.26E-53	5.982905983	0	0	0	100800	0.5	1	1	0	0	2.11E-56	1
IFNG-AS1	C06	0.053319014	0.048054062	263070	0.534965867	1.36E-15	4.49E-13	7.692307692	0.689983345	0.207695983	0.201317595	126330	0.626636905	1.35E-54	3.55E-51	26.19047619	0.895833333	2.71E-54	1
KLRB1	C06	0.905675683	0.755261128	366506.5	0.74530911	5.64E-51	6.16E-48	58.97435897	12.77658815	0.088992134	0.016426481	101297.5	0.502467758	0.899054565	0.982701492	7.142857143	6.729166667	1.13E-50	1
AUTS2	C06	0.065167684	0.063023759	268231.5	0.545462033	6.40E-39	6.45E-36	9.401709402	0.309302879	0	-0.002166085	100485	0.4984375	0.71717796	0.947229325	0	0.3125	1.28E-38	1
S100A11	C06	0.346186065	0.291933974	326580.5	0.664117612	6.09E-38	5.70E-35	39.31623932	7.161551273	0.276514358	0.140640029	119449.5	0.59250744	0.001607911	0.055918636	35.71428571	17.02083333	1.22E-37	1
TBX21	C06	0.078023046	0.069447349	268103.5	0.545201738	1.43E-15	4.58E-13	10.25641026	1.237211516	0.099021026	0.096048441	114777	0.569330357	1.87E-34	4.10E-31	14.28571429	0.416666667	3.75E-34	1
TNFAIP3	C06	1.206546588	0.712130982	382998	0.778845391	8.04E-29	7.03E-26	85.47008547	48.70330716	0.851956511	0.215535538	118533.5	0.58796379	0.039794159	0.403200322	71.42857143	60.83333333	1.61E-28	1
TGFB1	C06	1.259133628	0.684280755	383482.5	0.779830646	1.21E-27	9.95E-25	86.32478632	57.29241018	0.781300287	0.220074638	123529	0.612743056	0.007729249	0.15417004	76.19047619	59.75	2.43E-27	1
ENC1	C06	0.056784528	0.054475686	263977	0.536810296	3.75E-27	2.89E-24	7.692307692	0.333095408	0.033007009	0.014798214	103031	0.511066468	0.366118503	0.947229325	4.761904762	2.541666667	7.50E-27	1
IL12RB2	C06	0.044935858	0.029019732	255171	0.518902859	0.007321643	0.125482433	5.982905983	2.212705211	0.108674957	0.104547126	114623	0.568566468	3.13E-26	5.86E-23	14.28571429	0.583333333	6.26E-26	1
CST7	C06	0.191592101	0.16397925	295639	0.601196541	4.81E-26	3.51E-23	23.93162393	3.830597192	0.016503504	0.012026929	102549	0.508675595	0.16720708	0.828641781	2.380952381	0.645833333	9.62E-26	1
SMAD7	C06	0.184661074	0.153049786	298131	0.606264146	1.91E-25	1.32E-22	25.64102564	4.401617892	0	-0.020096925	97902	0.485625	0.265042901	0.947229325	0	2.875	3.82E-25	1
ZFP36L2	C06	2.048550202	0.738097725	381486	0.775770664	9.88E-25	6.48E-22	98.29059829	88.46062336	1.229755371	0.15476184	112734	0.559196429	0.180056915	0.849856647	85.71428571	82.47916667	1.98E-24	1
RGS16	C06	0.264388624	0.215338413	304918.5	0.620066863	1.42E-24	8.86E-22	29.91452991	6.067094932	0.04266094	-0.014941556	98443	0.488308532	0.558885935	0.947229325	4.761904762	7.1875	2.84E-24	1
AC092580.4	C06	0.039011523	0.037925549	258133.5	0.52492725	5.27E-24	3.14E-21	5.128205128	0.142755175	0	0	100800	0.5	1	1	0	0	1.05E-23	1
ID2	C06	0.191146665	0.158070747	292630.5	0.595078607	9.33E-22	5.32E-19	23.07692308	4.18748513	0.016503504	-0.048856091	94540	0.468948413	0.151210934	0.799672878	2.380952381	8.5625	1.87E-21	1
F2R	C06	0.062708863	0.058421014	265435	0.539775211	2.90E-21	1.58E-18	8.547008547	0.594813229	0	-0.002743708	100401	0.498020833	0.683284787	0.947229325	0	0.395833333	5.79E-21	1
FTH1	C06	2.753480829	0.590638945	371422.5	0.755306039	3.31E-21	1.73E-18	100	99.16726148	2.331111586	0.143100396	117043	0.580570437	0.070928225	0.555911097	100	99.77083333	6.61E-21	1
SGSM1	C06	0.005924335	0.005003278	247684	0.503677674	0.035173495	0.33401745	0.854700855	0.118962646	0.033007009	0.032573792	105537	0.523497024	3.76E-21	5.02E-18	4.761904762	0.0625	7.51E-21	1
CTC-548K16.2	C06	0	0	245875.5	0.5	1	1	0	0	0.033007009	0.032573792	105537	0.523497024	3.76E-21	5.02E-18	4.761904762	0.0625	7.51E-21	1
TYMS	C06	0	0	245875.5	0.5	1	1	0	0	0.033007009	0.03248932	105536	0.523492063	3.83E-21	5.02E-18	4.761904762	0.0625	7.65E-21	1
CTSW	C06	0.230603624	0.185617879	299076	0.60818585	1.10E-20	5.53E-18	27.35042735	5.971924816	0.033007009	0.015809054	103198	0.511894841	0.31560914	0.947229325	4.761904762	2.375	2.19E-20	1
ANXA1	C06	0.261231991	0.192240507	306956	0.62421022	2.24E-20	1.09E-17	33.33333333	8.327385201	0.326996823	0.186385443	115895	0.574875992	0.007228779	0.147626991	28.57142857	15.02083333	4.48E-20	1
CISH	C06	0.041470344	0.03932642	259825.5	0.528368016	4.85E-19	2.27E-16	5.982905983	0.309302879	0.04266094	-0.001701783	99740	0.494742063	0.773651548	0.947229325	4.761904762	5.916666667	9.69E-19	1
STOM	C06	0.122958904	0.105228688	279865	0.569119331	5.50E-19	2.49E-16	16.23931624	2.450630502	0.026157435	0.023413728	102810.5	0.509972718	0.044861854	0.435928273	2.380952381	0.395833333	1.10E-18	1
KLF10	C06	0.150121757	0.126040615	284284.5	0.578106603	8.75E-19	3.82E-16	18.8034188	3.259576493	0.082517521	0.012265143	103268	0.512242063	0.587410299	0.947229325	11.9047619	9.3125	1.75E-18	1
C12orf75	C06	0.300243514	0.215369371	311606	0.633666225	1.90E-18	8.03E-16	37.60683761	11.30145134	0.319175298	0.184906405	124472	0.617420635	7.40E-05	0.006480411	40.47619048	17.45833333	3.80E-18	1
GRASP	C06	0.117034569	0.099799105	277891.5	0.565106121	2.12E-17	8.70E-15	15.38461538	2.403045444	0.049510513	0.006556451	102022.5	0.506063988	0.740090663	0.947229325	7.142857143	5.895833333	4.25E-17	1
S100A4	C06	1.307074705	0.590645787	351662	0.715122084	1.33E-16	5.29E-14	83.76068376	59.76683321	1.244051509	0.361697104	126917.5	0.629551091	0.003015281	0.085201184	83.33333333	67.125	2.66E-16	1
APOBEC3H	C06	0.029621674	0.028962005	254049.5	0.516622234	1.60E-16	6.19E-14	3.418803419	0.095170117	0	-0.001155245	100632	0.499166667	0.791796478	0.947229325	0	0.166666667	3.21E-16	1
TIPARP	C06	0.222220468	0.163929786	298385	0.606780667	2.64E-16	9.91E-14	29.05982906	7.875327147	0.016503504	-0.013437544	98913.5	0.490642361	0.548839857	0.947229325	2.380952381	4.25	5.29E-16	1
PLEKHF1	C06	0.17728461	0.138114884	289683	0.58908472	6.56E-16	2.39E-13	23.07692308	5.400904116	0.033007009	0.008180092	102046	0.506180556	0.665812764	0.947229325	4.761904762	3.520833333	1.31E-15	1
GAPDH	C06	1.689403588	0.427854468	351978.5	0.715765703	7.25E-16	2.57E-13	97.43589744	92.17225791	1.730443517	0.283115727	126684.5	0.628395337	0.003807799	0.098664124	100	95.29166667	1.45E-15	1
ZFYVE28	C06	0.145649551	0.114533014	285543.5	0.580666842	9.06E-16	3.12E-13	20.51282051	4.377825363	0.075667948	0.061660599	108411.5	0.537755456	6.53E-04	0.030999469	9.523809524	2.020833333	1.81E-15	1
CD99	C06	0.813928576	0.388892184	343056.5	0.697622374	1.37E-15	4.49E-13	76.92307692	48.10849393	0.87684622	0.394294224	139557	0.692247024	3.71E-06	7.23E-04	80.95238095	52.625	2.74E-15	1
RNF166	C06	0.34026173	0.227441945	312512	0.635508621	1.62E-15	5.07E-13	41.02564103	14.82274566	0.236657776	0.129532878	113850	0.564732143	0.018743395	0.263109906	26.19047619	14.6875	3.25E-15	1
N4BP3	C06	0.033087188	0.03176785	255919	0.520423954	1.79E-15	5.45E-13	4.273504274	0.190340233	0	-0.009819585	99372	0.492916667	0.437478313	0.947229325	0	1.416666667	3.58E-15	1
DUSP2	C06	0.870367625	0.470126681	339997.5	0.691401746	1.91E-15	5.70E-13	70.94017094	41.25624554	0.731795217	0.133664167	111828	0.554702381	0.195773176	0.875365139	64.28571429	55.20833333	3.82E-15	1
TIMP1	C06	0.319923729	0.230145178	305880.5	0.622023138	2.27E-15	6.54E-13	35.04273504	11.63454675	0.125178461	0.051231234	107667	0.5340625	0.141986074	0.771159658	16.66666667	9.875	4.55E-15	1
